# Supplementary material for: Cystic-fibrosis related-diabetes (CFRD) is preceded by and associated with growth failure and deteriorating lung function
Source: publisher site journal article supplement (doi:10.1515/jpem-2017-0005), 2017-01-01
Supplement: Supplementary file 1 [file jpem-2017-0005_suppl.docx]

Supplemental Data

Supplemental Table 1 Patient characteristics of CFRD patients including gender, age of diagnosis of diabetes, length of observational period (whole, pre and post diagnosis of diabetes), and result of analysis of *CFTR* gene of each patient.

| **Number (CFRD patient)** | **Gender** | **Age of diagnosis of CFRD** | **Observational period pre diagnosis of CFRD** | **Observational period post diagnosis of CFRD** | **Whole observational period** | **CFTR mutations** | | |
| --- | --- | --- | --- | --- | --- | --- | --- | --- |
| **(years)** | **(years)** | **(years)** | **(years)** | **Legacy name** | **cDNA name (HGVS)** | **Mutation class** |
| 1 | f | 16.3 | ≥ 3 | ≥ 3 | 6.5 | R347P/Q1313X | c.1040G>C/c.3937C>T | 4/1 |
| 2 | f | 11.2 | ≥ 3 | ≥ 3 | 16.3 | F508del/F508del | c.1521_1523delCTT/c.1521_1523delCTT | 2/2 |
| 3 | f | 15 | ≥ 3 | ≥ 3 | 10.1 | N1303K/unknown | c.3909C>G/unknown | 2/? |
| 4 | f | 14.7 | ≥ 3 | <2.5 | 7.9 | F508del/F508del | c.1521_1523delCTT/c.1521_1523delCTT | 2/2 |
| 5 | f | 12.5 | ≥ 3 | ≥ 3 | 17.4 | F508del/F508del | c.1521_1523delCTT/c.1521_1523delCTT | 2/2 |
| 6 | f | 12.7 | ≥ 3 | ≥ 3 | 19.9 | F508del/F508del | c.1521_1523delCTT/c.1521_1523delCTT | 2/2 |
| 7 | f | 17.8 | ≥ 3 | <0.5 | 7.3 | F508del/unknown | c.1521_1523delCTT/unknown | 2/? |
| 8 | f | 15 | ≥ 3 | ≥ 3 | 18.1 | F508del/F508del | c.1521_1523delCTT/c.1521_1523delCTT | 2/2 |
| 9 | f | 18 | ≥ 3 | <0.5 | 18.1 | F508del/F508del | c.1521_1523delCTT/c.1521_1523delCTT | 2/2 |
| 10 | f | 13.2 | ≥ 3 | ≥ 3 | 8.3 | F508del/N1303K | c.1521_1523delCTT/c.3909C>G | 2/2 |
| 11 | m | 10.9 | ≥ 3 | ≥ 3 | 14.1 | F508del/3121-2A>G | c.1521_1523delCTT/c.2989-2A>G | 2/1 |
| 12 | m | 11.8 | ≥ 3 | ≥ 3 | 16.6 | F508del/F508del | c.1521_1523delCTT/c.1521_1523delCTT | 2/2 |
| 13 | m | 19.2 | ≥ 3 | <0.5 | 14.5 | F508del/F508del | c.1521_1523delCTT/c.1521_1523delCTT | 2/2 |
| 14 | m | 17.1 | ≥ 3 | <1 | 7.5 | F508del/3600+2insT | c.1521_1523delCTT/c.3468+2dupC | 2/1 |
| 15 | m | 9.9 | ≥ 3 | ≥ 3 | 20 | F508del/3600+2insT | c.1521_1523delCTT/c.3468+2dupC | 2/1 |
| 16 | m | 14.1 | ≥ 3 | ≥ 3 | 19.8 | F508del/4010del4 | c.1521_1523delCTT/c.3882_3885delTATT | 2/1 |
| Median |  | 14.4 |  |  | 15.4 |  |  |  |
| Mean |  | 14.3 |  |  | 13.9 |  |  |  |

Median and mean age of diagnosis and length of observational period are given. HGVS, Human Genome Variation Society.

Supplemental Table 2 Patient characteristics of matched CF patients without diabetes including gender, length of observational period, and result of analysis of CFTR gene of each patient.

| **Number (matched CF patient)** | **Gender** | **Whole observational period** | **CFTR mutations** | | |
| --- | --- | --- | --- | --- | --- |
|  | **(years)** | **Legacy name** | **cDNA name (HGVS)** | **Mutation class** |
| 17 | f | 9.8 | R1162X/2143delT | c.3484C>T/c.2012delT | 1/1 |
| 18 | f | 15.9 | F508del/F508del | c.1521_1523delCTT/c.1521_1523delCTT | 2/2 |
| 19 | f | 8.8 | F508del/F508del | c.1521_1523delCTT/c.1521_1523delCTT | 2/2 |
| 20 | f | 12.4 | F508del/N1303K | c.1521_1523delCTT/c.3909C>G | 2/2 |
| 21 | f | 16.7 | F508del/3849+10kbC->T | c.1521_1523delCTT/c.3717+12191C>T | 2/5 |
| 22 | f | 15.4 | F508del/3849+10kbC->T | c.1521_1523delCTT/c.3717+12191C>T | 2/5 |
| 23 | f | 12 | F508del/unknown | c.1521_1523delCTT/c.1521_1523delCTT | 2/2 |
| 24 | f | 8.3 | N1303K/G480S | c.3909C>G/c.1438G>A | 2/? |
| 25 | f | 11.1 | F508del/F508del | c.1521_1523delCTT/c.1521_1523delCTT | 2/2 |
| 26 | f | 8.3 | F508del/F508del | c.1521_1523delCTT/c.1521_1523delCTT | 2/2 |
| 27 | m | 19.8 | F508del/F508del | c.1521_1523delCTT/c.1521_1523delCTT | 2/2 |
| 28 | m | 13 | F508del/R117H | c.1521_1523delCTT/c.350G>A | 2/4 |
| 29 | m | 11.5 | F508del/R347P | c.1521_1523delCTT/c.1040G>C | 2/3 |
| 30 | m | 13.2 | F508del/4010del4 | c.1521_1523delCTT/c.3882_3885delTATT | 2/1 |
| 31 | m | 18 | F508del/F508del | c.1521_1523delCTT/c.1521_1523delCTT | 2/2 |
| 32 | m | 16.4 | F508del/F508del | c.1521_1523delCTT/c.1521_1523delCTT | 2/2 |
| Median |  | 12.7 |  |  |  |
| Mean |  | 13.2 |  |  |  |

Median and mean length of observational period are given. HGVS, Human Genome Variation Society.Supplemental Table 3 Patient characteristics of CFRD patients including diabetes treatment details (ICT, intensified conventional treatment), mean HbA1c during 3 years post diagnosis of CFRD (only values within the observational period are given), *Pseudomonas aeruginosa* infection and chronic infection status at time of diagnosis of diabetes, duration of chronic *Pseudomonas aeruginosa* infection before diagnosis of diabetes, diagnosis of allergic bronchopulmonary aspergillosis (ABPA) pre or post diagnosis of diabetes, and diagnosis of liver cirrhosis pre or post diagnosis of diabetes (sonographic signs of liver cirrhosis and Child Pugh score A in all patients).

| **Number (CFRD patient)** | **Start of diabetes therapy post diagnosis of CFRD: Glibenclamide**  **or Repaglinide** | **Start of diabetes therapy post diagnosis of CFRD: Insulin (ICT)** | **Mean HbA1c post diagnosis of CFRD** | ***P. aeruginosa* infection before or during observational period** | **Chronic**  ***P. aeruginosa* infection at time of diagnosis of CFRD** | **Duration of *P. aeruginosa* infection pre diagnosis of CFRD** | **ABPA pre/post diagnosis of CFRD** | **Liver cirrhosis pre/post diagnosis of CFRD** |
| --- | --- | --- | --- | --- | --- | --- | --- | --- |
| **(years)** | **(years)** | **(%)** |  |  | **(years)** | **(years)** | **(years)** |
| 1 | not used | not used |  | no | no |  | none | none |
| 2 | 1.5 | 6 | 6.2 | yes | no |  | none | none |
| 3 | 1 | not used | 6.2 | no | no |  | none | none |
| 4 | 1.5 | not used | 5.6 | yes | yes | 4 | none | none |
| 5 | not used | 0 | 6.8 | yes | no |  | none | none |
| 6 | 0 | 2.5 | 6.9 | yes | no |  | 1.5 (pre) | none |
| 7 | 0 | not used |  | yes | yes | 15 | none | none |
| 8 | not used | 3 | 5.7 | yes | no |  | none | none |
| 9 | not used | not used |  | yes | no |  | none | none |
| 10 | not used | 0 | 10.8 | yes | no |  | none | none |
| 11 | not used | not used | 5.7 | no | no |  | none | none |
| 12 | 0.5 | 5 | 6.0 | yes | no |  | 5 (post) | none |
| 13 | not used | 0 |  | no | no |  | none | none |
| 14 | 0 | not used |  | yes | no |  | none | none |
| 15 | not used | 0 | 6.9 | yes | yes | 7 | none | 4 (post) |
| 16 | not used | not used | 5.6 | yes | yes | 3 | none | 1 (post) |
| Median |  |  | 6.2 |  |  |  |  |  |
| Mean |  |  | 6.5 |  |  |  |  |  |

Supplemental Table 4 Patient characteristics of matched CF patients including *Pseudomonas aeruginosa* infection and chronic infection status at age of diagnosis of diabetes, duration of chronic *Pseudomonas aeruginosa* infection before age of diagnosis of diabetes, diagnosis of allergic bronchopulmonary aspergillosis (ABPA) pre or post age of diagnosis of diabetes, and diagnosis of liver cirrhosis pre or post age of diagnosis of diabetes (sonographic signs of liver cirrhosis and Child Pugh score A).

| **Number (matched CF patient)** | ***P. aeruginosa* infection before or during observational period** | **Chronic**  ***P. aeruginosa* infection at time of diagnosis of CFRD** | **Duration of *P. aeruginosa* infection pre diagnosis of CFRD** | **ABPA pre/post diagnosis of CFRD** | **Liver cirrhosis pre/post diagnosis of CFRD** |
| --- | --- | --- | --- | --- | --- |
|  |  |  | **(years)** | **(years)** | **(years)** |
| 17 | yes | yes | 17 | none | none |
| 18 | yes | yes | 3.5 | none | none |
| 19 | no | no |  | none | none |
| 20 | yes | yes | 5 | 3 (post) | none |
| 21 | no | no |  | none | 1 (pre) |
| 22 | yes | no |  | none | none |
| 23 | no | no |  | none | none |
| 24 | yes | no |  | none | none |
| 25 | yes | yes | 3 | none | none |
| 26 | yes | no |  | none | none |
| 27 | yes | no |  | none | none |
| 28 | yes | no |  | none | none |
| 29 | no | no |  | none | none |
| 30 | yes | no |  | none | none |
| 31 | yes | no |  | none | none |
| 32 | yes | yes | 7.5 | none | none |
